# Supplementary material for: Ionic liquid crystals modifier to NiOnano@MWCNTs for effective electrocatalytic water splitting and hydrazine degradation
Source: Research Square preprint supplement (doi:10.21203/rs.3.rs-8716489/v1), 2026-02-03
Supplement: Supplementary file 1 [file 05c63a4e8c1a8e4ddd07a73a.docx]

**Ionic liquid crystals modifier to NiOnano@MWCNTs for effective electrocatalytic water splitting and hydrazine degradation**

Hussien K. Srour1,2*, Nada F. Atta1, Mohamed W. Khalil1 and Ahmed Galal1*

1Department of Chemistry, Faculty of Science, Cairo University, 12613 Giza, Egypt

2Department of Applied Chemistry, Graduate School of Engineering, Kyushu University, 744 Motooka Nishi-ku Fukuoka 819-0395, Japan

*Corresponding authors (E-mails: [galal@sci.cu.edu.eg](mailto:galal@sci.cu.edu.eg);  [srour.hussien.258@s.kyushu-u.ac.jp](mailto:%20srour.hussien.258@s.kyushu-u.ac.jp))

| ILCs/NiO-CNTs (As-prepared) | | | |
| --- | --- | --- | --- |
| Element | Weight % | Atomic % | Error % |
| Ni K | 52.18 | 17.37 | 3.28 |
| O K | 8.09 | 9.28 | 13.16 |
| C K | 38.02 | 70.72 | 11.91 |
| N K | 1.71 | 2.63 | 71.65 |
| ILCs/NiO-CNTs (After exhaustive electrolysis) | | | |
| Ni K | 49.45 | 15.91 | 3.31 |
| O K | 10.82 | 11.02 | 13.93 |
| C K | 38.11 | 70.82 | 11.04 |
| N K | 1.62 | 2.25 | 71.72 |

**Table S1.** Elemental composition of the ILCs/NiO-CNTs composite film before and after exposure to a constant applied potential of +0.85 V (vs. RHE) in 0.5 M Hyz/1.0 M KOH. Data from the EDS measurements of the surfaces displayed in Figures 1(D) and 1(E), respectively.


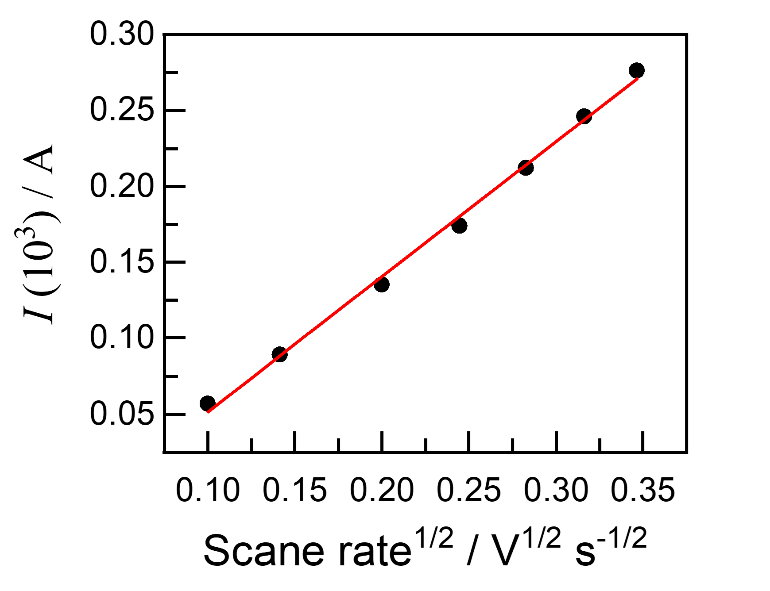


**Figure S1****.** Peak current vs. square root of the scan rate relation for Ni/ILC/NiO-CNTs in 1.0 mM K4[Fe(CN)6] & 0.5 M KCl solution as electrolyte.


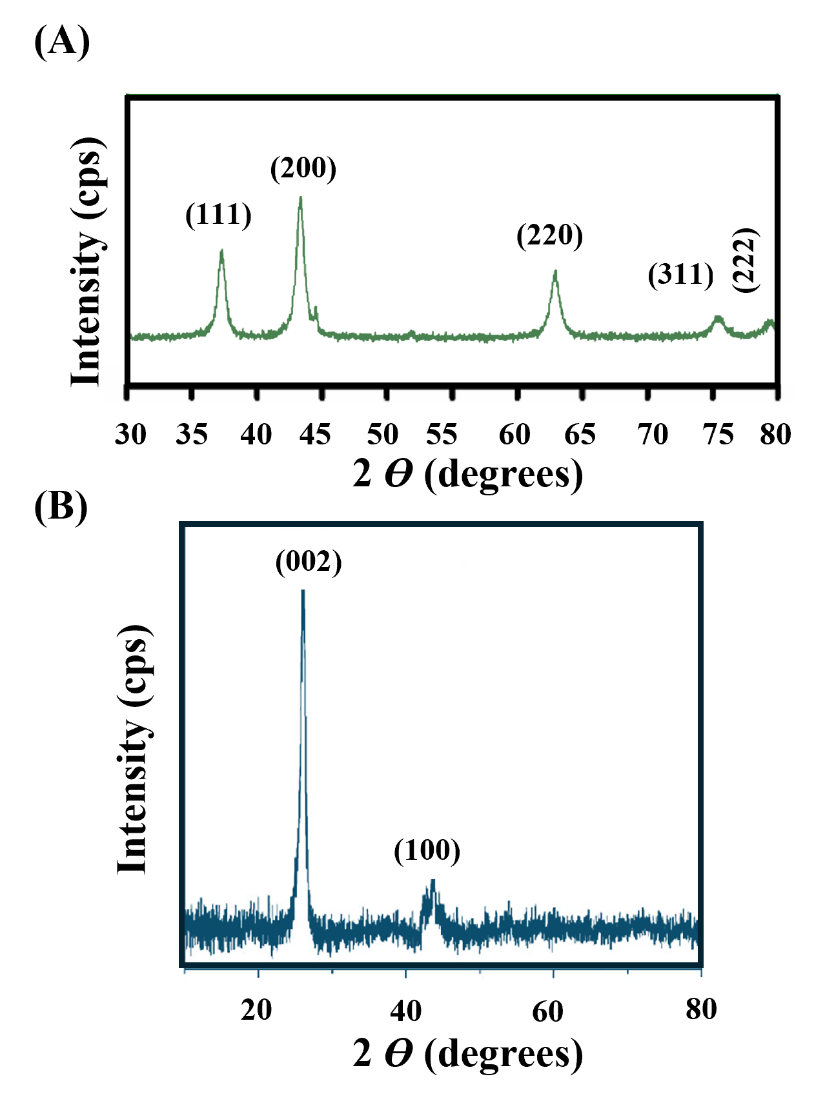


**Figure S2.** The standard phase diagrams of NiO nanoparticles (A), and MWCNTs (B) [1,2].

From the Scherrer equation:

Where *d* is the grain size; *K* is constant related to the shape and index of crystals is = 0.89; *λ* is the wavelength of the X-ray (Cu Ka, is = 1.54056 Å); *θ* is the diffraction angle of the peak; *B* represents the full width at half-height of the peaks (in radian). *B* is given by:

*B*2 = *Bm*2 − *Bs*2

Where *Bm* is the full width at half maximum (FWHM) of the sample and *Bs* is the half-width of a standard sample with a known crystal size. The particle size of NiO is 25.3 nm which was calculated from the spacing of the (111) plane.

**Equation S1.** Detailed calculation of particle size of NiO in ILCs/NiO-CNTs composite after exposure to 0.5 M Hyz/1.0 M KOH for one hour exhaustive electrolysis at +0.85 V vs. RHE. Data from XRD diffraction pattern of Figure 4.


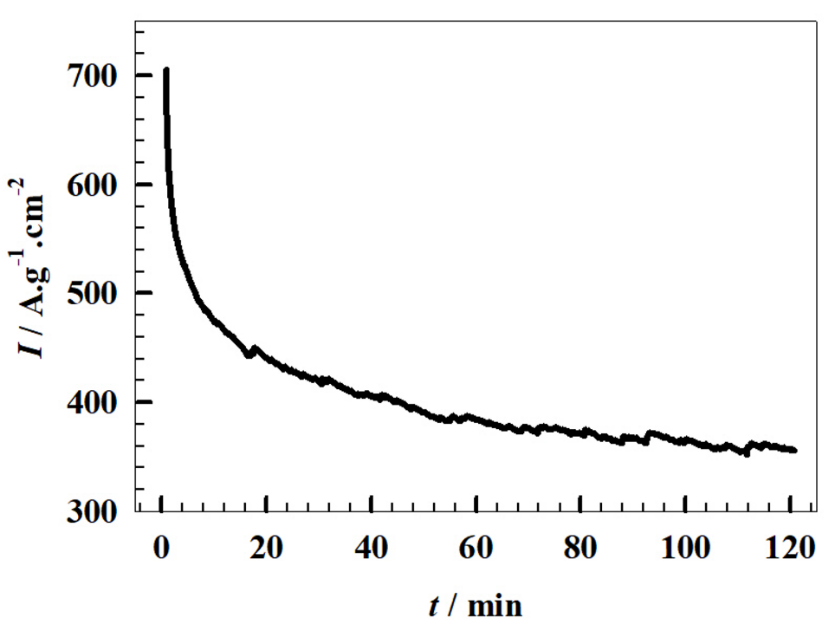


**Figure S3**. Chronoamperograms over Ni/ILCs/NiO-CNTs electrode in presence of 0.50 M Hyz/1.0 M KOH for two hours. *E*app corresponds to the onset potential for Hyz-OER.


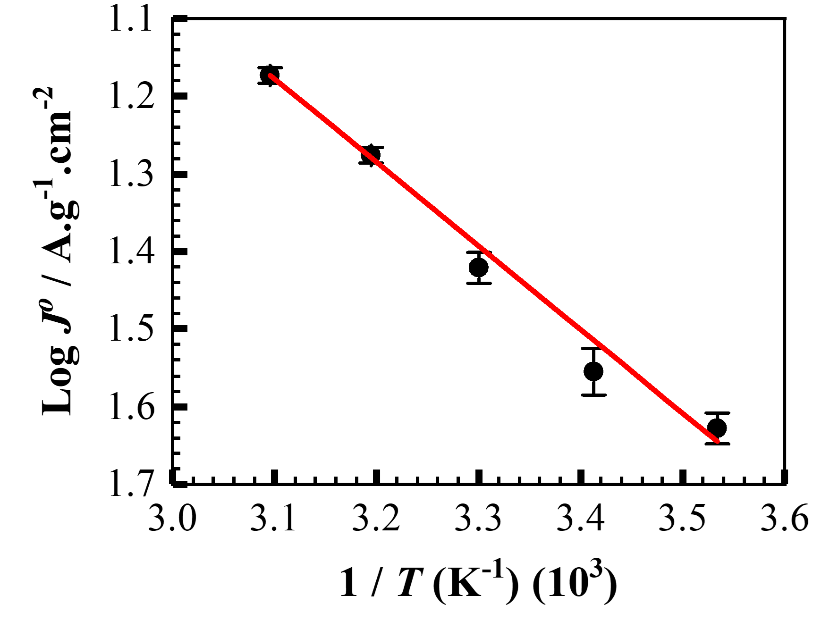


**Figure S4**. Correlated Arrhenius plot of log (anodic peak currents) vs. the reciprocal of temperature in 0.5 M Hyz /1.0 M KOH

| Type of Catalyst | *T* (K) | TOF (h-1 ) | *E*a (kJ/mol) | Reference |
| --- | --- | --- | --- | --- |
| TiO2@Ni | 343 | 265.49 | 58.67 | [3] |
| Ni/CeO2 | 323 | 51.6 | 47.0 | [4] |
| PtNi/(MnOx)2-C3N4 | 323 | 2749 | 48.7 | [5] |
| NiPt/Al2O3 | 303 | 16.5 | 52.5 | [6] |
| NiPt/graphene | 323 | 846 | 23.9 | [7] |
| RhNi/Ce(OH)CO3 | 303 | 150 | 38.8 | [8] |
| PtNi/PDA-rGO | 323 | 2056 | 33.3 | [9] |
| Ni0.9Pt0.1/Ce2O3 | 298 | 28.1 | 42.3 | [10] |
| Ni-Cr (OH)3/C-TiO2 | 323 | 266 | 54.8 | [11] |
| Ni-La(OH)3/Ti-MOF | 343 | 870 | 36.8 | [12] |
| NiFeMo | 298 | 28.8 | 50.7 | [13] |
| RhNi@CeOx/rGO | 323 | 370 | 58.0 | [14] |
| RhNiB | 298 | 75 | - | [15] |
| NiPt/ZrO2 | 298 | 296 | 24.40 | [16] |
| PtNi/CNS | 323 | 3928 | 37.97 | [17] |
| PtNi/ Zr-MOF | 323 | 1716 | 33.7 | [18] |
| Ni–Pt @ MIL-101/rGO | 323 | 960 | 35.3 | [19,20] |
| Ni0.8Pt0.2/DT-Ti3C2T*x* | 323 | 1220 | - | [21] |
| Ni/Fe/Pd | 313 | 25.3 | 32.1 | [22] |
| Ni/Fe/Ag | 313 | 38.4 | 42.3 | [22] |
| Ni/Fe/Cu | 313 | 40.2 | 44.6 | [22] |
| Pd/Ag/Ni | 313 | 30.2 | 75.9 | [22] |
| NiFePd | 323 | 21.5 | 40.0 | [23] |
| Ni0.6Pd0.4-MoOx | 323 | 405 | 32.6/49.7 | [24] |
| Ni@TNTs | 333 | 96.0 | - | [25] |
| Ni0.9Fe0.1- Cr2O3 | 343 | 893.5 | 83.6 | [26] |
| ILCs/NiO-CNTs | 298 | 1751 | 3.91 | **This work** |

$ Rate constant calculated when using 0.5 M hydrazine in 1.0 M KOH

**Table S2.** Comparison of the performance of the proposed catalyst to different Ni-containing catalysts

**References**

1. Ravichandran, S., Sengodan, P. & Radhakrishnan, J. Evaluation of biosynthesized nickel oxide nanoparticles from Clerodendrum phlomidis: A promising photocatalyst for methylene blue and acid blue dyes degradation. *Ceram. Int.* **49**, 12408–12414 (2023).

2. Soleimani, H. *et al.* Impact of carbon nanotubes based nanofluid on oil recovery efficiency using core flooding. *Results Phys.* **9**, 39–48 (2018).

3. Liu, Y. *et al.* TiO2 nanoparticle-supported Ni catalyst for the dehydrogenation of hydrazine hydrate. *Chemosphere* **313**, 137608 (2023).

4. He, L. *et al.* Cerium-oxide-modified nickel as a non-noble metal catalyst for selective decomposition of hydrous hydrazine to hydrogen. *ACS Catal.* **5**, 1623–1628 (2015).

5. Zheng, J. *et al.* Mn-Modified Graphitic Carbon Nitride-Supported Bimetallic PtNi Nanoparticles for Hydrogen Generation from Hydrous Hydrazine. *ChemistrySelect* **7**, (2022).

6. He, L. *et al.* Surface modification of Ni/Al2O3 with Pt: Highly efficient catalysts for H2 generation via selective decomposition of hydrous hydrazine. *J. Catal.* **298**, 1–9 (2013).

7. Chen, J., Lu, Z. H., Huang, W., Kang, Z. & Chen, X. Galvanic replacement synthesis of NiPt/graphene as highly efficient catalysts for hydrogen release from hydrazine and hydrazine borane. *J. Alloys Compd.* **695**, 3036–3043 (2017).

8. Chen, J., Yao, Q., Zhu, J., Chen, X. & Lu, Z. H. Rh–Ni nanoparticles immobilized on Ce(OH)CO3 nanorods as highly efficient catalysts for hydrogen generation from alkaline solution of hydrazine. *Int. J. Hydrogen Energy* **41**, 3946–3954 (2016).

9. Song, F. Z., Zhu, Q. L. & Xu, Q. Monodispersed PtNi nanoparticles deposited on diamine-alkalized graphene for highly efficient dehydrogenation of hydrous hydrazine at room temperature. *J. Mater. Chem. A* **3**, 23090–23094 (2015).

10. Wang, H. L., Yan, J. M., Wang, Z. L., O, S. Il & Jiang, Q. Highly efficient hydrogen generation from hydrous hydrazine over amorphous Ni0.9Pt0.1/Ce2O3 nanocatalyst at room temperature. *J. Mater. Chem. A* **1**, 14957–14962 (2013).

11. Zhang, X. *et al.* Carbon-doped mesoporous TiO2-immobilized Ni nanoparticles: Oxygen defect engineering enhances hydrogen production. *Appl. Catal. B Environ.* **339**, 123153 (2023).

12. Long, J., Yao, Q., Zhang, X., Wu, H. & Lu, Z. H. Defects engineering of metal-organic framework immobilized Ni-La(OH)3 nanoparticles for enhanced hydrogen production. *Appl. Catal. B Environ.* **320**, 121989 (2023).

13. Wang, H. L., Yan, J. M., Li, S. J., Zhang, X. W. & Jiang, Q. Noble-metal-free NiFeMo nanocatalyst for hydrogen generation from the decomposition of hydrous hydrazine. *J. Mater. Chem. A* **3**, 121–124 (2015).

14. Zhang, Z., Lu, Z. H., Tan, H., Chen, X. & Yao, Q. CeOx-modified RhNi nanoparticles grown on rGO as highly efficient catalysts for complete hydrogen generation from hydrazine borane and hydrazine. *J. Mater. Chem. A* **3**, 23520–23529 (2015).

15. Wang, J., Li, W., Wen, Y., Gu, L. & Zhang, Y. Rh-Ni-B nanoparticles as highly efficient catalysts for hydrogen generation from hydrous hydrazine. *Adv. Energy Mater.* **5**, (2015).

16. Hussain, S. N. *et al.* NiPt nanoparticle immobilization on zirconia (ZrO2) for the production of hydrogen through selected decomposition of alkaline hydrazine solution. *Mater. Sci. Eng. B* **302**, 117267 (2024).

17. Xu, F., Wang, Y., Wang, C., Huang, W. & Liu, X. Dehydrogenation of hydrous hydrazine over carbon nanosphere- supported PtNi nanoparticles for on-demand H2 release. *Fuel* **332**, 126116 (2023).

18. Hu, X. *et al.* Fine-tuning catalytic performance of ultrafine bimetallic nickel-platinum on metal-organic framework derived nanoporous carbon/metal oxide toward hydrous hydrazine decomposition. *Int. J. Hydrogen Energy* **48**, 16001–16006 (2023).

19. Zou, H. *et al.* Immobilization of Ni–Pt nanoparticles on MIL-101/rGO composite for hydrogen evolution from hydrous hydrazine and hydrazine borane. *J. Alloys Compd.* **835**, 155426 (2020).

20. Berčič, G. & Blaž Likozar. Analysis and recompilation of kinetic data about the hydrogen production by the catalytic decomposition of hydrous hydrazine. *Int. J. Hydrogen Energy* **47**, 29348–29357 (2022).

21. Guo, F., Zou, H., , Qilu Yao, B. H. & Lu, Z.-H. Monodispersed bimetallic nanoparticles anchored on TiO2-decorated titanium carbide MXene for efficient hydrogen production from hydrazine in aqueous solution. *Renew. Energy* **155**, 1293–1301 (2020).

22. Al-Thubaiti, K. S. & Zaheer Khan. Trimetallic nanocatalysts to enhanced hydrogen production from hydrous hydrazine: The role of metal centers. *Int. J. Hydrogen Energy* **45**, 13960–13974 (2020).

23. Bhattacharjee, D. & Dasgupta, S. Trimetallic NiFePd nanoalloy catalysed hydrogen generation from alkaline hydrous hydrazine and sodium borohydride at room temperature. *J. Mater. Chem. A* **3**, 24371–24378 (2015).

24. Yao, Q., Yang, K., Nie, W., Li, Y. & Zhang-Hui Lu. Highly efficient hydrogen generation from hydrazine borane via a MoOx-promoted NiPd nanocatalyst. *Renew. Energy* **147**, 2024–2031 (2020).

25. Wang, H. *et al.* Ni nanoparticles encapsulated in the channel of titanate nanotubes: Efficient noble-metal-free catalysts for selective hydrogen generation from hydrous hydrazine. *Chem. Eng. J.* **332**, 637–646 (2018).

26. Chen, J. *et al.* Cr2O3-modified NiFe nanoparticles as a noble-metal-free catalyst for complete dehydrogenation of hydrazine in aqueous solution. *Appl. Surf. Sci.* **501**, 144247 (2020).
